# Supplementary material for: Unravelling the 6sp ← 6s absorption spectra of Bi(iii) complexes
Source: Royal Society of Chemistry journal article supplement (doi:10.1039/d3dt03744d), 2023-12-20
Supplement: d3dt03744d1.pdf [file d3dt03744d1.pdf]

Electronic Supplementary Information (ESI)  
for:

Unravelling the  $6sp \leftarrow 6s$  Absorption  
Spectra of Bi(III) Complexes

Charlene Harriswangler,<sup>a</sup> Fátima Lucio-Martínez,<sup>a</sup>  
Aurora Rodríguez-Rodríguez,<sup>a</sup> David Esteban-  
Gómez,<sup>a</sup> and Carlos Platas Iglesias<sup>a,\*</sup>

Email: [carlos.platas.iglesias@udc.es](mailto:carlos.platas.iglesias@udc.es)

## Summary

|                                                                                                                                                                                                                                                                                                   |    |
|---------------------------------------------------------------------------------------------------------------------------------------------------------------------------------------------------------------------------------------------------------------------------------------------------|----|
| Figure S1. $^1\text{H}$ -NMR spectrum of compound $[\text{Bi}(\text{NOTA})]$ (400 MHz, $\text{D}_2\text{O}$ , 298 K).....                                                                                                                                                                         | 1  |
| Figure S2. $^{13}\text{C}\{^1\text{H}\}$ -NMR spectrum of compound $[\text{Bi}(\text{NOTA})]$ (101 MHz, $\text{D}_2\text{O}$ , 298 K)<br>.....                                                                                                                                                    | 1  |
| Figure S3. Experimental high resolution mass spectrum (ESI <sup>+</sup> ) of compound<br>$[\text{Bi}(\text{NOTA})]$ .....                                                                                                                                                                         | 2  |
| Figure S4. Optimised geometries of $[\text{BiCl}_5]^{2-}$ and $[\text{BiCl}_6]^{3-}$ obtained with DFT<br>calculations. The numbers correspond to bond distances in Å. ....                                                                                                                       | 3  |
| Figure S5. Optimised geometry of the $[\text{Bi}(\text{DMSO})_8]^{3+}$ system obtained with DFT<br>calculations. The numbers correspond to bond distances in Å. ....                                                                                                                              | 4  |
| Figure S6. Optimised geometries of the $[\text{Bi}(\text{NOTA})]$ (a), $[\text{Bi}(\text{NOTA})\text{Cl}]^-$ (b),<br>$[\text{Bi}(\text{NOTA})\text{Br}]^-$ (c) and $[\text{Bi}(\text{NOTA})\text{I}]^-$ (d) obtained with DFT calculations. The numbers<br>correspond to bond distances in Å..... | 5  |
| Table S1. Cartesian coordinates obtained from geometry optimizations for the $[\text{BiCl}_6]^{3-}$<br>system. ....                                                                                                                                                                               | 6  |
| Table S2. Cartesian coordinates obtained from geometry optimizations for the $[\text{BiCl}_5]^{2-}$<br>system (square pyramidal).....                                                                                                                                                             | 6  |
| Table S3. Cartesian coordinates obtained from geometry optimizations for the<br>$[\text{Bi}(\text{DMSO})_8]^{3+}$ system. ....                                                                                                                                                                    | 7  |
| Table S4. Cartesian coordinates obtained from geometry optimizations for the<br>$[\text{Bi}(\text{NOTA})]$ system ( $\Delta(\delta\delta\delta)$ isomer). ....                                                                                                                                    | 9  |
| Table S5. Cartesian coordinates obtained from geometry optimizations for the<br>$[\text{Bi}(\text{NOTA})]$ system ( $\Lambda(\delta\delta\delta)$ isomer). ....                                                                                                                                   | 10 |
| Table S6. Cartesian coordinates obtained from geometry optimizations for the<br>$[\text{Bi}(\text{NOTA})\text{Cl}]^-$ system. ....                                                                                                                                                                | 11 |
| Table S7. Cartesian coordinates obtained from geometry optimizations for the<br>$[\text{Bi}(\text{NOTA})\text{Br}]^-$ system. ....                                                                                                                                                                | 12 |
| Table S8. Cartesian coordinates obtained from geometry optimizations for the<br>$[\text{Bi}(\text{NOTA})\text{I}]^-$ system.....                                                                                                                                                                  | 13 |
| Sample ORCA input file. ....                                                                                                                                                                                                                                                                      | 14 |
| Table S9. Last orbital frozen during the NEVPT2 step and orbitals included in the active<br>space. ....                                                                                                                                                                                           | 16 |

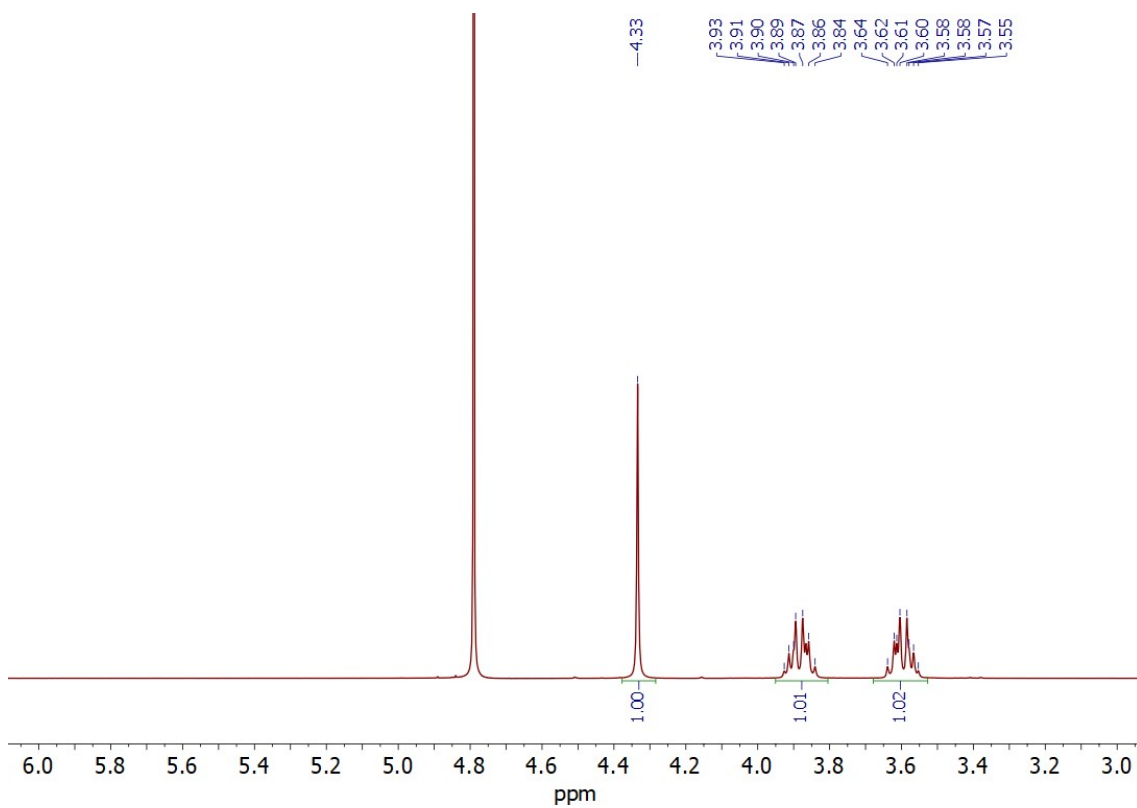

**Figure S1.**  $^1\text{H}$ -NMR spectrum of compound  $[\text{Bi}(\text{NOTA})]$  (400 MHz,  $\text{D}_2\text{O}$ , 298 K)

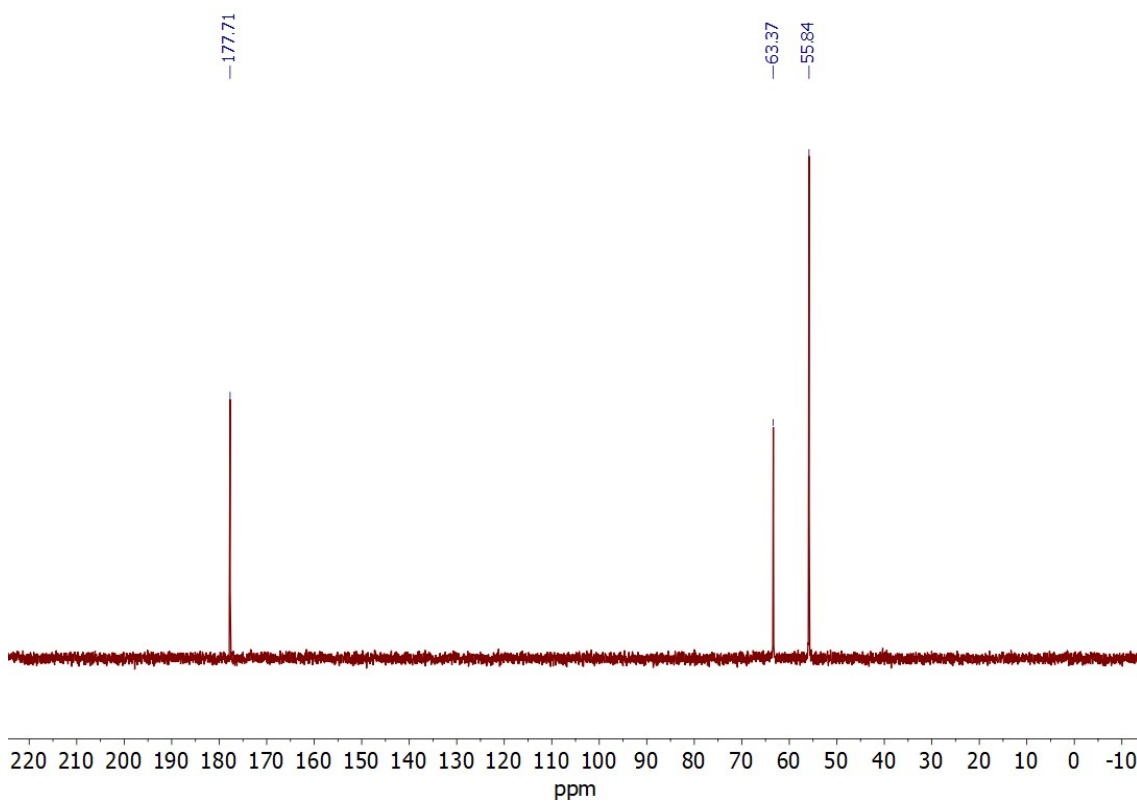

**Figure S2.**  $^{13}\text{C}\{^1\text{H}\}$ -NMR spectrum of compound  $[\text{Bi}(\text{NOTA})]$  (101 MHz,  $\text{D}_2\text{O}$ , 298 K)

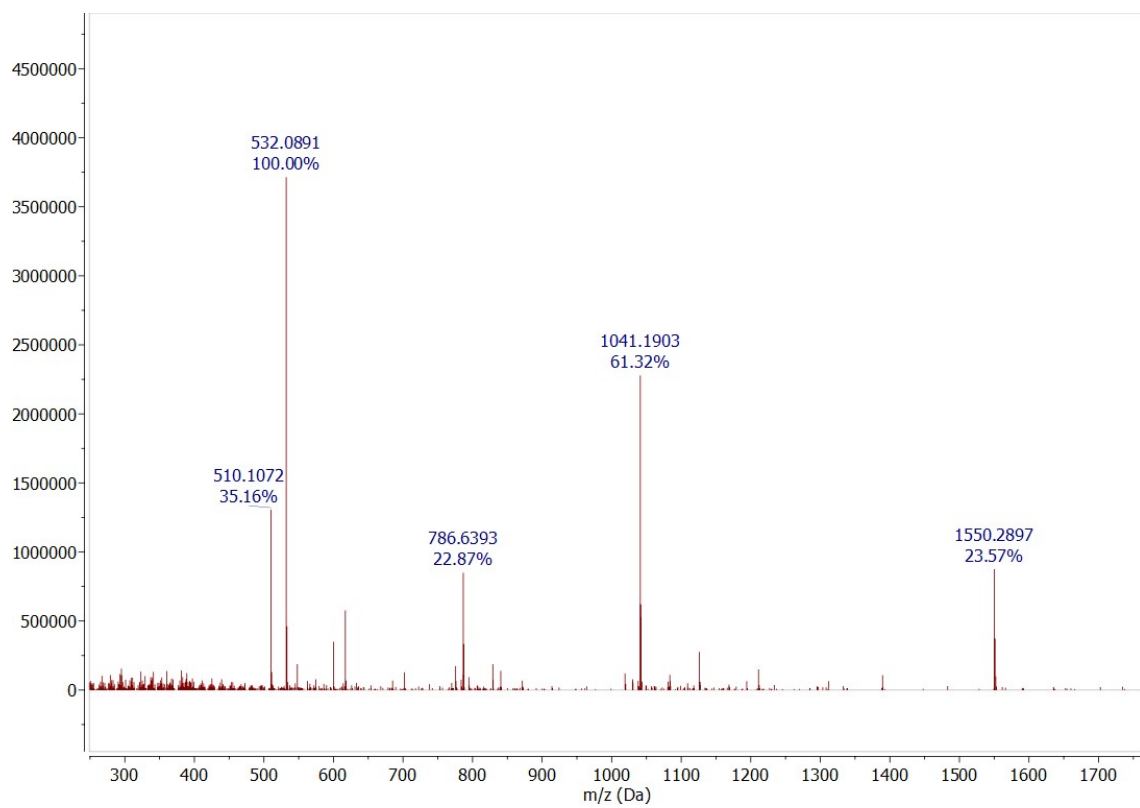

**Figure S3.** Experimental high resolution mass spectrum (ESI<sup>+</sup>) of compound [Bi(NOTA)].

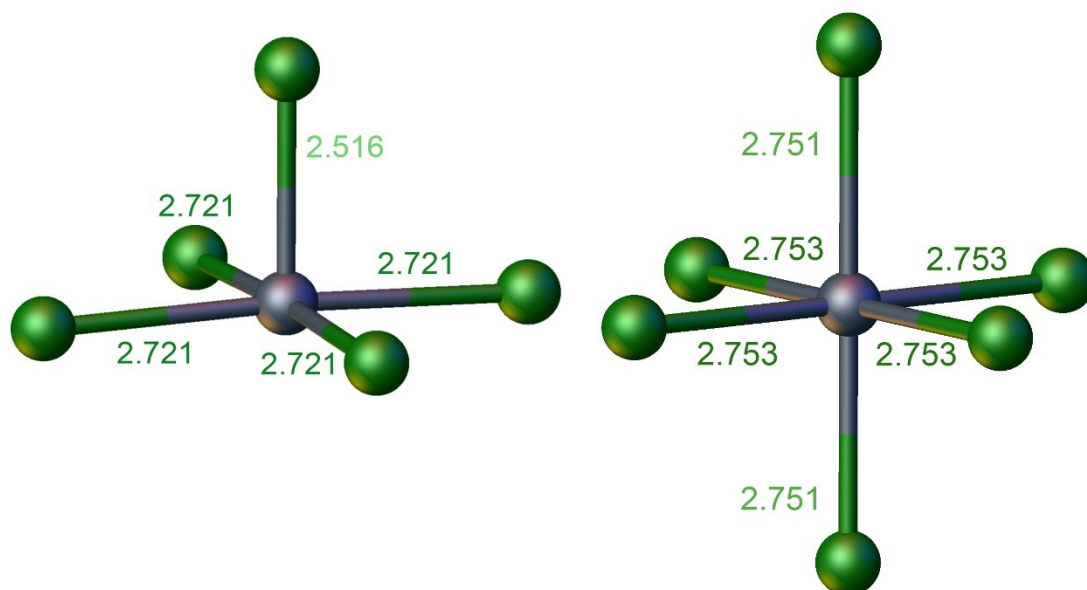

**Figure S4.** Optimised geometries of [BiCl<sub>5</sub>]<sup>2-</sup> and [BiCl<sub>6</sub>]<sup>3-</sup> obtained with DFT calculations. The numbers correspond to bond distances in Å.

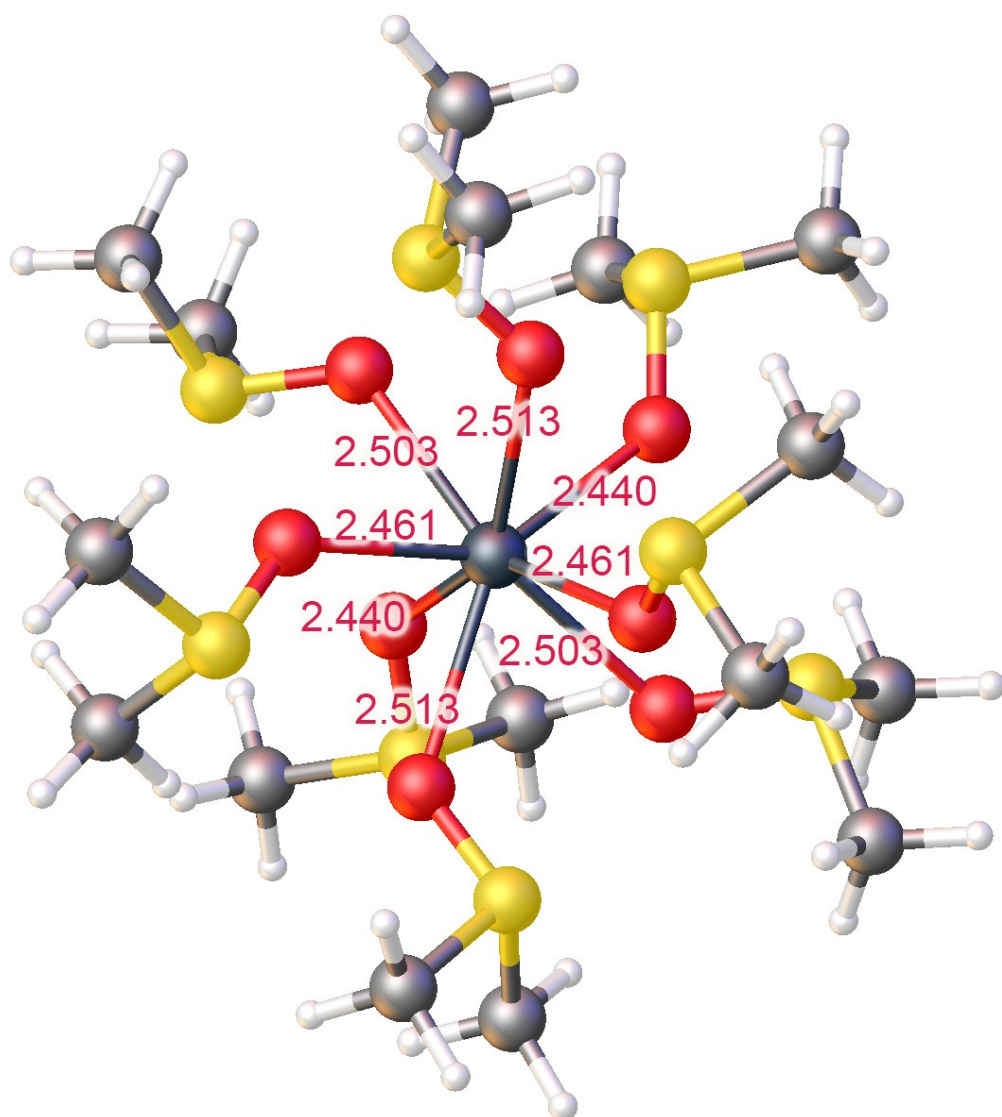

**Figure S5.** Optimised geometry of the  $[\text{Bi}(\text{DMSO})_8]^{3+}$  system obtained with DFT calculations. The numbers correspond to bond distances in Å.

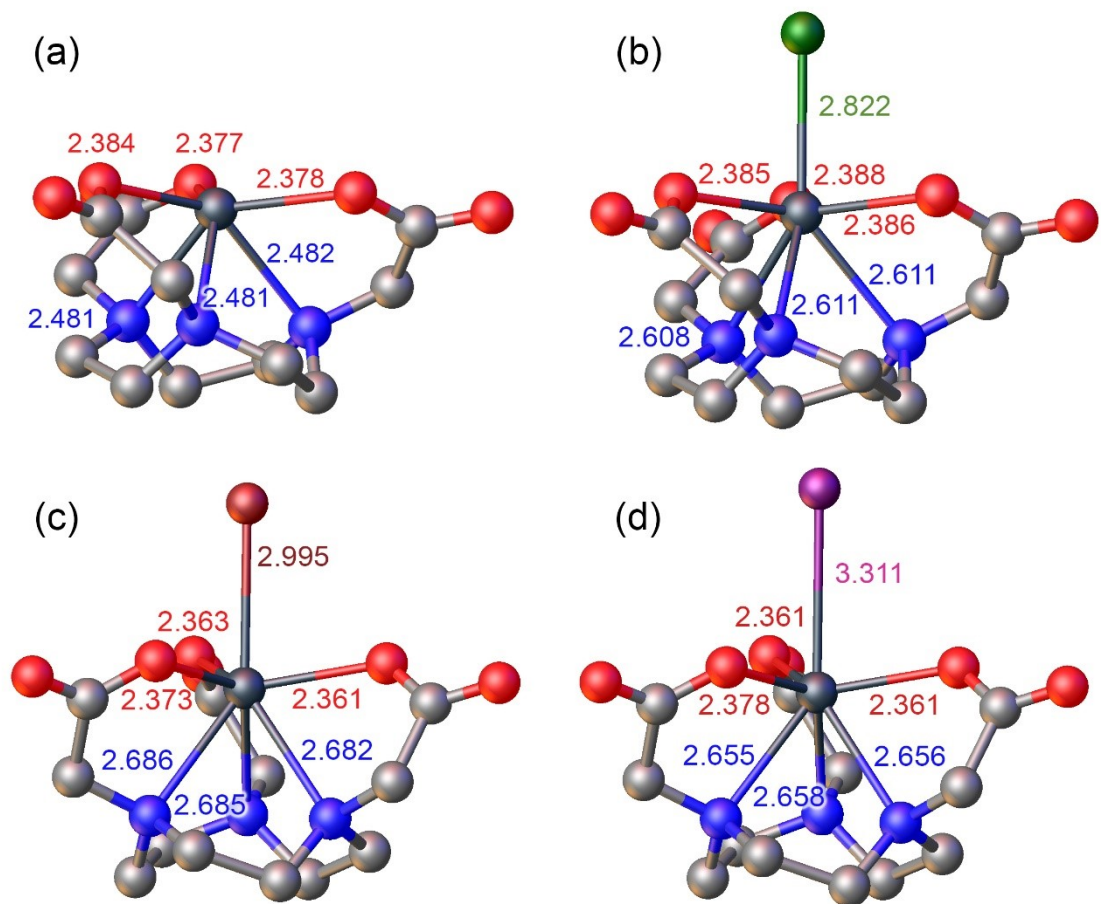

**Figure S6.** Optimised geometries of the  $[\text{Bi}(\text{NOTA})]$  (a),  $[\text{Bi}(\text{NOTA})\text{Cl}]^-$  (b),  $[\text{Bi}(\text{NOTA})\text{Br}]^-$  (c) and  $[\text{Bi}(\text{NOTA})\text{I}]^-$  (d) obtained with DFT calculations. The numbers correspond to bond distances in Å.

**Table S1.** Cartesian coordinates obtained from geometry optimizations for the  $[\text{BiCl}_6]^{3-}$  system.

| Center Number | Atomic Number | Coordinates (Angstroms) |           |           |
|---------------|---------------|-------------------------|-----------|-----------|
|               |               | X                       | Y         | Z         |
| 1             | 83            | 0.000403                | -0.000553 | 0.000340  |
| 2             | 17            | 1.182712                | 1.342957  | 2.092362  |
| 3             | 17            | -1.859783               | 2.012387  | -0.240889 |
| 4             | 17            | 1.644416                | 1.313386  | -1.774261 |
| 5             | 17            | -1.181879               | -1.344086 | -2.091656 |
| 6             | 17            | 1.860604                | -2.013502 | 0.241538  |
| 7             | 17            | -1.643675               | -1.314472 | 1.774897  |

E(RwB97XD) = -2976.7175547 Hartree

Zero-point correction = 0.004057

Thermal correction to Energy = 0.017444

Thermal correction to Enthalpy = 0.018388

Thermal correction to Gibbs Free Energy = -0.041233

Sum of electronic and zero-point Energies = -2976.713498

Sum of electronic and thermal Energies = -2976.700111

Sum of electronic and thermal Enthalpies = -2976.699167

Sum of electronic and thermal Free Energies = -2976.758788

**Table S2.** Cartesian coordinates obtained from geometry optimizations for the  $[\text{BiCl}_5]^{2-}$  system (square pyramidal).

| Center Number | Atomic Number | Coordinates (Angstroms) |           |           |
|---------------|---------------|-------------------------|-----------|-----------|
|               |               | X                       | Y         | Z         |
| 1             | 83            | 0.058086                | 0.043159  | -0.058510 |
| 2             | 17            | 1.180271                | 1.333395  | 2.058391  |
| 3             | 17            | -1.832980               | 1.991411  | -0.240596 |
| 4             | 17            | 1.559150                | 1.244134  | -1.681972 |
| 5             | 17            | -1.160292               | -1.324173 | -2.070876 |
| 6             | 17            | 1.852589                | -1.982155 | 0.227849  |

E(RwB97XD) = -2516.3130116 Hartree

Zero-point correction = 0.003641

Thermal correction to Energy = 0.014646

Thermal correction to Enthalpy = 0.015590

Thermal correction to Gibbs Free Energy = -0.038143

Sum of electronic and zero-point Energies = -2516.309370

Sum of electronic and thermal Energies = -2516.298366

Sum of electronic and thermal Enthalpies = -2516.297422

Sum of electronic and thermal Free Energies = -2516.351155



**Table S3.** Cartesian coordinates obtained from geometry optimizations for the  $[\text{Bi}(\text{DMSO})_8]^{3+}$  system.

| Center Number | Atomic Number | Coordinates (Angstroms) |           |           |
|---------------|---------------|-------------------------|-----------|-----------|
|               |               | X                       | Y         | Z         |
| 1             | 83            | 0.000000                | 0.000000  | 0.030813  |
| 2             | 16            | -3.273854               | -0.840332 | 1.094145  |
| 3             | 8             | -1.848688               | -1.371028 | 1.014219  |
| 4             | 6             | -3.748138               | -1.053312 | 2.800399  |
| 5             | 1             | -3.138625               | -0.366043 | 3.382575  |
| 6             | 1             | -3.576813               | -2.083321 | 3.109018  |
| 7             | 1             | -4.800463               | -0.792605 | 2.908286  |
| 8             | 6             | -4.277567               | -2.117726 | 0.357691  |
| 9             | 1             | -4.011747               | -2.155261 | -0.696420 |
| 10            | 1             | -5.327047               | -1.846281 | 0.467248  |
| 11            | 1             | -4.078409               | -3.073010 | 0.840446  |
| 12            | 16            | 3.273854                | 0.840332  | 1.094145  |
| 13            | 8             | 1.848688                | 1.371028  | 1.014219  |
| 14            | 6             | 4.277567                | 2.117726  | 0.357691  |
| 15            | 1             | 4.011747                | 2.155261  | -0.696420 |
| 16            | 1             | 5.327047                | 1.846281  | 0.467248  |
| 17            | 1             | 4.078409                | 3.073010  | 0.840446  |
| 18            | 6             | 3.748138                | 1.053312  | 2.800399  |
| 19            | 1             | 3.138625                | 0.366043  | 3.382575  |
| 20            | 1             | 3.576813                | 2.083321  | 3.109018  |
| 21            | 1             | 4.800463                | 0.792605  | 2.908286  |
| 22            | 16            | 1.015347                | 3.144724  | -1.488208 |
| 23            | 8             | -0.138665               | 2.301013  | -0.968672 |
| 24            | 6             | 1.123756                | 4.540820  | -0.383882 |
| 25            | 1             | 1.452027                | 4.152552  | 0.576908  |
| 26            | 1             | 0.150121                | 5.019032  | -0.293310 |
| 27            | 1             | 1.860379                | 5.239366  | -0.779802 |
| 28            | 6             | 0.355383                | 3.976688  | -2.922984 |
| 29            | 1             | 0.161440                | 3.218690  | -3.678511 |
| 30            | 1             | 1.102402                | 4.678535  | -3.292266 |
| 31            | 1             | -0.562155               | 4.499385  | -2.658272 |
| 32            | 16            | 0.776293                | -2.661810 | 2.302225  |
| 33            | 8             | 1.135329                | -1.279528 | 1.770704  |
| 34            | 6             | -0.000000               | -2.354986 | 3.878046  |
| 35            | 1             | -0.930418               | -1.836303 | 3.660836  |
| 36            | 1             | 0.651072                | -1.741068 | 4.497668  |
| 37            | 1             | -0.206073               | -3.308877 | 4.362273  |
| 38            | 6             | 2.326946                | -3.336308 | 2.868964  |
| 39            | 1             | 2.947990                | -3.509972 | 1.993334  |
| 40            | 1             | 2.129044                | -4.283981 | 3.369138  |
| 41            | 1             | 2.808775                | -2.636712 | 3.549342  |
| 42            | 16            | -1.015347               | -3.144724 | -1.488208 |

|    |    |           |           |           |
|----|----|-----------|-----------|-----------|
| 43 | 8  | 0.138665  | -2.301013 | -0.968672 |
| 44 | 6  | -0.355383 | -3.976688 | -2.922984 |
| 45 | 1  | -0.161440 | -3.218690 | -3.678511 |
| 46 | 1  | -1.102402 | -4.678535 | -3.292266 |
| 47 | 1  | 0.562155  | -4.499385 | -2.658272 |
| 48 | 6  | -1.123756 | -4.540820 | -0.383882 |
| 49 | 1  | -1.452027 | -4.152552 | 0.576908  |
| 50 | 1  | -0.150121 | -5.019032 | -0.293310 |
| 51 | 1  | -1.860379 | -5.239366 | -0.779802 |
| 52 | 16 | -0.776293 | 2.661810  | 2.302225  |
| 53 | 8  | -1.135329 | 1.279528  | 1.770704  |
| 54 | 6  | -2.326946 | 3.336308  | 2.868964  |
| 55 | 1  | -2.947990 | 3.509972  | 1.993334  |
| 56 | 1  | -2.129044 | 4.283981  | 3.369138  |
| 57 | 1  | -2.808775 | 2.636712  | 3.549342  |
| 58 | 6  | 0.000000  | 2.354986  | 3.878046  |
| 59 | 1  | 0.930418  | 1.836303  | 3.660836  |
| 60 | 1  | -0.651072 | 1.741068  | 4.497668  |
| 61 | 1  | 0.206073  | 3.308877  | 4.362273  |
| 62 | 16 | -2.201310 | 0.974980  | -2.713650 |
| 63 | 8  | -1.852331 | 0.007254  | -1.590010 |
| 64 | 6  | -3.407607 | 0.093823  | -3.688477 |
| 65 | 1  | -2.900722 | -0.746300 | -4.157204 |
| 66 | 1  | -3.784769 | 0.764981  | -4.459607 |
| 67 | 1  | -4.217737 | -0.252133 | -3.049418 |
| 68 | 6  | -3.272015 | 2.193606  | -1.971478 |
| 69 | 1  | -2.654036 | 2.761798  | -1.280851 |
| 70 | 1  | -4.083569 | 1.691728  | -1.447651 |
| 71 | 1  | -3.660949 | 2.843924  | -2.754275 |
| 72 | 16 | 2.201310  | -0.974980 | -2.713650 |
| 73 | 6  | 3.272015  | -2.193606 | -1.971478 |
| 74 | 1  | 2.654036  | -2.761798 | -1.280851 |
| 75 | 1  | 4.083569  | -1.691728 | -1.447651 |
| 76 | 1  | 3.660949  | -2.843924 | -2.754275 |
| 77 | 6  | 3.407607  | -0.093823 | -3.688477 |
| 78 | 1  | 2.900722  | 0.746300  | -4.157204 |
| 79 | 1  | 3.784769  | -0.764981 | -4.459607 |
| 80 | 1  | 4.217737  | 0.252133  | -3.049418 |
| 81 | 8  | 1.852331  | -0.007254 | -1.590010 |

-----  
E(RwB97XD) = -4640.030995 Hartree

Zero-point correction = 0.652466

Thermal correction to Energy = 0.709983

Thermal correction to Enthalpy = 0.710927

Thermal correction to Gibbs Free Energy = 0.552671

Sum of electronic and zero-point Energies = -4639.378529

Sum of electronic and thermal Energies = -4639.321012

Sum of electronic and thermal Enthalpies = -4639.320068

Sum of electronic and thermal Free Energies = -4639.478324

**Table S4.** Cartesian coordinates obtained from geometry optimizations for the [Bi(NOTA)] system ( $\Delta(\delta\delta\delta)$  isomer).

| Center Number | Atomic Number | Coordinates (Angstroms) |           |           |
|---------------|---------------|-------------------------|-----------|-----------|
|               |               | X                       | Y         | Z         |
| 1             | 83            | -0.176402               | 0.034977  | 0.237585  |
| 2             | 6             | -1.867712               | -1.583581 | -1.963286 |
| 3             | 6             | -0.704752               | -1.020511 | -2.790003 |
| 4             | 1             | -0.538578               | -1.663370 | -3.656005 |
| 5             | 1             | -1.021338               | -0.043392 | -3.157970 |
| 6             | 6             | 0.979798                | -1.499096 | 2.809082  |
| 7             | 6             | 1.709311                | -2.197676 | 1.655008  |
| 8             | 1             | 2.652833                | -2.603828 | 2.023425  |
| 9             | 1             | 1.084702                | -3.037384 | 1.346518  |
| 10            | 6             | 0.197028                | 3.215974  | -0.022612 |
| 11            | 6             | 1.645486                | 2.712786  | -0.038328 |
| 12            | 1             | 2.267871                | 3.432769  | -0.572353 |
| 13            | 1             | 1.982195                | 2.687949  | 0.999221  |
| 14            | 6             | 1.117239                | -2.177058 | -1.708165 |
| 15            | 1             | 1.462605                | -2.660399 | -2.625565 |
| 16            | 1             | 0.319934                | -2.794911 | -1.296704 |
| 17            | 6             | 2.270753                | -2.106906 | -0.721885 |
| 18            | 1             | 2.547587                | -3.123494 | -0.446684 |
| 19            | 1             | 3.152342                | -1.677945 | -1.188967 |
| 20            | 6             | 2.964596                | -0.314316 | 0.813957  |
| 21            | 1             | 3.934370                | -0.797910 | 0.956135  |
| 22            | 1             | 2.688195                | 0.143961  | 1.763271  |
| 23            | 6             | 3.097525                | 0.759633  | -0.252109 |
| 24            | 1             | 3.777644                | 1.525946  | 0.116782  |
| 25            | 1             | 3.562835                | 0.358943  | -1.147721 |
| 26            | 6             | 1.580270                | 1.414854  | -2.074235 |
| 27            | 1             | 2.383857                | 1.980313  | -2.552905 |
| 28            | 1             | 0.651732                | 1.956625  | -2.251240 |
| 29            | 6             | 1.497534                | 0.037667  | -2.710756 |
| 30            | 1             | 1.208398                | 0.160056  | -3.753494 |
| 31            | 1             | 2.473966                | -0.437429 | -2.729380 |
| 32            | 7             | 0.536862                | -0.853009 | -2.019301 |
| 33            | 7             | 1.935450                | -1.326471 | 0.491856  |
| 34            | 7             | 1.795289                | 1.366825  | -0.611934 |
| 35            | 8             | 0.279358                | -0.469386 | 2.498372  |
| 36            | 8             | -1.791986               | -1.421378 | -0.692651 |
| 37            | 8             | -2.794738               | -2.111112 | -2.557603 |
| 38            | 8             | 1.078892                | -1.978234 | 3.927502  |
| 39            | 8             | 0.006029                | 4.418796  | 0.064758  |
| 40            | 8             | -0.717151               | 2.316569  | -0.064439 |

E(RwB97XD) = -1298.6400072 Hartree

Zero-point correction = 0.322329

Thermal correction to Energy = 0.342753  
 Thermal correction to Enthalpy = 0.343697  
 Thermal correction to Gibbs Free Energy = 0.272245  
 Sum of electronic and zero-point Energies = -1298.317678  
 Sum of electronic and thermal Energies = -1298.297254  
 Sum of electronic and thermal Enthalpies = -1298.296310  
 Sum of electronic and thermal Free Energies = -1298.367762

**Table S5.** Cartesian coordinates obtained from geometry optimizations for the [Bi(NOTA)] system ( $\Lambda(\delta\delta\delta)$  isomer).

| Center Number | Atomic Number | Coordinates (Angstroms) |           |           |
|---------------|---------------|-------------------------|-----------|-----------|
|               |               | X                       | Y         | Z         |
| 1             | 83            | 0.020136                | -0.006911 | -0.450930 |
| 2             | 6             | 2.508205                | -0.531080 | 1.485624  |
| 3             | 6             | 1.465127                | -1.579680 | 1.897974  |
| 4             | 1             | 1.578755                | -2.427178 | 1.219343  |
| 5             | 1             | 1.676518                | -1.932324 | 2.907334  |
| 6             | 6             | -1.647978               | -2.485315 | -1.577663 |
| 7             | 6             | -2.708902               | -1.495549 | -1.074731 |
| 8             | 1             | -2.879784               | -0.775076 | -1.877080 |
| 9             | 1             | -3.647205               | -2.020241 | -0.895672 |
| 10            | 6             | -1.069821               | 2.971304  | -0.870757 |
| 11            | 6             | -0.676392               | 2.901451  | 0.611815  |
| 12            | 1             | 0.395691                | 3.101125  | 0.666884  |
| 13            | 1             | -1.189051               | 3.686803  | 1.166993  |
| 14            | 6             | -0.900563               | -2.159767 | 1.741816  |
| 15            | 1             | -0.990336               | -2.644507 | 2.716650  |
| 16            | 1             | -0.537637               | -2.899064 | 1.033186  |
| 17            | 6             | -2.276311               | -1.658438 | 1.320759  |
| 18            | 1             | -2.905719               | -2.525270 | 1.123049  |
| 19            | 1             | -2.750639               | -1.126311 | 2.140092  |
| 20            | 6             | -3.048254               | 0.459723  | 0.348720  |
| 21            | 1             | -4.062007               | 0.219655  | 0.676893  |
| 22            | 1             | -3.119145               | 0.978471  | -0.603282 |
| 23            | 6             | -2.400428               | 1.361230  | 1.392583  |
| 24            | 1             | -2.915085               | 2.321209  | 1.376536  |
| 25            | 1             | -2.556503               | 0.955587  | 2.387853  |
| 26            | 6             | -0.178940               | 1.362807  | 2.439416  |
| 27            | 1             | -0.578784               | 1.976227  | 3.249940  |
| 28            | 1             | 0.843754                | 1.679660  | 2.254098  |
| 29            | 6             | -0.206772               | -0.096335 | 2.876627  |
| 30            | 1             | 0.514642                | -0.221442 | 3.683268  |
| 31            | 1             | -1.174966               | -0.342379 | 3.302407  |
| 32            | 7             | 0.090254                | -1.069627 | 1.791073  |
| 33            | 7             | -2.268226               | -0.770882 | 0.126481  |
| 34            | 7             | -0.941552               | 1.578846  | 1.196990  |
| 35            | 8             | -0.432047               | -2.177158 | -1.308140 |

|    |   |           |           |           |
|----|---|-----------|-----------|-----------|
| 36 | 8 | 2.109896  | 0.338398  | 0.631077  |
| 37 | 8 | 3.634315  | -0.611315 | 1.950920  |
| 38 | 8 | -2.012050 | -3.456761 | -2.221199 |
| 39 | 8 | -1.361581 | 4.057060  | -1.347750 |
| 40 | 8 | -1.016269 | 1.860858  | -1.509555 |

-----  
E(RwB97XD) = -1298.6457176 Hartree

Zero-point correction = 0.323202

Thermal correction to Energy = 0.343214

Thermal correction to Enthalpy = 0.344159

Thermal correction to Gibbs Free Energy = 0.274832

Sum of electronic and zero-point Energies = -1298.322516

Sum of electronic and thermal Energies = -1298.302503

Sum of electronic and thermal Enthalpies = -1298.301559

Sum of electronic and thermal Free Energies = -1298.370886

**Table S6.** Cartesian coordinates obtained from geometry optimizations for the [Bi(NOTA)Cl]<sup>-</sup> system.

| Center<br>Number | Atomic<br>Number | Coordinates (Angstroms) |           |           |
|------------------|------------------|-------------------------|-----------|-----------|
|                  |                  | X                       | Y         | Z         |
| 1                | 83               | 0.032615                | -0.080781 | -0.816010 |
| 2                | 6                | -0.904607               | -3.165239 | -0.334453 |
| 3                | 6                | -0.185439               | -2.917894 | 0.994052  |
| 4                | 1                | -0.561296               | -3.632792 | 1.732072  |
| 5                | 1                | 0.869977                | -3.143707 | 0.826951  |
| 6                | 6                | -2.226560               | 2.268276  | -0.995256 |
| 7                | 6                | -2.637027               | 1.632758  | 0.335780  |
| 8                | 1                | -3.208292               | 2.367457  | 0.911074  |
| 9                | 1                | -3.311891               | 0.808288  | 0.095742  |
| 10               | 6                | 3.168153                | 0.716776  | -0.408323 |
| 11               | 6                | 2.559041                | 1.502770  | 0.756027  |
| 12               | 1                | 3.343375                | 1.695625  | 1.494053  |
| 13               | 1                | 2.243210                | 2.467820  | 0.353878  |
| 14               | 6                | -1.690313               | -1.258837 | 1.864152  |
| 15               | 1                | -1.972656               | -1.860283 | 2.736460  |
| 16               | 1                | -2.336380               | -1.565363 | 1.041184  |
| 17               | 6                | -1.949575               | 0.205842  | 2.177187  |
| 18               | 1                | -3.018414               | 0.326609  | 2.361179  |
| 19               | 1                | -1.463535               | 0.488906  | 3.107381  |
| 20               | 6                | -0.669020               | 2.213338  | 1.586475  |
| 21               | 1                | -1.217209               | 2.824135  | 2.313706  |
| 22               | 1                | -0.444765               | 2.854651  | 0.733727  |
| 23               | 6                | 0.636048                | 1.757741  | 2.219276  |
| 24               | 1                | 1.225660                | 2.646426  | 2.450349  |

|    |    |           |           |           |
|----|----|-----------|-----------|-----------|
| 25 | 1  | 0.448866  | 1.279103  | 3.177253  |
| 26 | 6  | 1.826265  | -0.380615 | 2.054666  |
| 27 | 1  | 2.460360  | -0.134969 | 2.914899  |
| 28 | 1  | 2.437447  | -0.958728 | 1.361424  |
| 29 | 6  | 0.669122  | -1.242605 | 2.532951  |
| 30 | 1  | 1.083161  | -2.166364 | 2.940447  |
| 31 | 1  | 0.157001  | -0.765110 | 3.364408  |
| 32 | 7  | -0.302745 | -1.541460 | 1.467057  |
| 33 | 7  | -1.508603 | 1.108325  | 1.099805  |
| 34 | 7  | 1.403373  | 0.842894  | 1.356922  |
| 35 | 8  | -1.143942 | 1.840837  | -1.532128 |
| 36 | 8  | -1.048371 | -2.156143 | -1.112321 |
| 37 | 8  | -1.271986 | -4.304118 | -0.594138 |
| 38 | 8  | -2.961085 | 3.117398  | -1.484647 |
| 39 | 8  | 4.348508  | 0.900026  | -0.678799 |
| 40 | 8  | 2.384305  | -0.067976 | -1.050849 |
| 41 | 17 | 0.254840  | -0.360014 | -3.524474 |

-----  
E(RwB97XD) = -1759.0435515 Hartree

Zero-point correction = 0.321596

Thermal correction to Energy = 0.344491

Thermal correction to Enthalpy = 0.345435

Thermal correction to Gibbs Free Energy = 0.267393

Sum of electronic and zero-point Energies = -1758.721955

Sum of electronic and thermal Energies = -1758.699061

Sum of electronic and thermal Enthalpies = -1758.698117

Sum of electronic and thermal Free Energies = -1758.776159

**Table S7.** Cartesian coordinates obtained from geometry optimizations for the [Bi(NOTA)Br]<sup>-</sup> system.

| Center<br>Number | Atomic<br>Number | Coordinates (Angstroms) |           |           |
|------------------|------------------|-------------------------|-----------|-----------|
|                  |                  | X                       | Y         | Z         |
| 1                | 83               | -0.031757               | -0.075417 | -0.799838 |
| 2                | 6                | 3.084434                | 0.761799  | -0.766659 |
| 3                | 6                | 2.987451                | -0.311486 | 0.326663  |
| 4                | 1                | 3.033431                | -1.280374 | -0.176092 |
| 5                | 1                | 3.854455                | -0.239795 | 0.985535  |
| 6                | 6                | -0.842941               | -3.125963 | -0.131564 |
| 7                | 6                | -1.729218               | -2.302473 | 0.813112  |
| 8                | 1                | -2.594026               | -1.976196 | 0.230987  |
| 9                | 1                | -2.095008               | -2.941197 | 1.618948  |
| 10               | 6                | -2.278691               | 2.228701  | -0.600252 |
| 11               | 6                | -1.125636               | 2.774607  | 0.253344  |
| 12               | 1                | -0.411780               | 3.233157  | -0.434915 |
| 13               | 1                | -1.499918               | 3.560084  | 0.912153  |
| 14               | 6                | 1.427536                | -1.472212 | 1.794112  |
| 15               | 1                | 2.110698                | -1.615535 | 2.636761  |

|    |    |           |           |           |
|----|----|-----------|-----------|-----------|
| 16 | 1  | 1.581991  | -2.295142 | 1.100365  |
| 17 | 6  | -0.001398 | -1.500694 | 2.324617  |
| 18 | 1  | -0.200525 | -2.507231 | 2.694841  |
| 19 | 1  | -0.092526 | -0.846317 | 3.187539  |
| 20 | 6  | -1.969616 | -0.114862 | 1.856450  |
| 21 | 1  | -2.431770 | -0.455328 | 2.788075  |
| 22 | 1  | -2.760834 | 0.009330  | 1.121253  |
| 23 | 6  | -1.289721 | 1.224234  | 2.119449  |
| 24 | 1  | -2.067195 | 1.956423  | 2.341877  |
| 25 | 1  | -0.678824 | 1.162499  | 3.016081  |
| 26 | 6  | 0.891027  | 2.130504  | 1.456948  |
| 27 | 1  | 0.822894  | 2.877366  | 2.253821  |
| 28 | 1  | 1.391735  | 2.595189  | 0.611111  |
| 29 | 6  | 1.717968  | 0.956375  | 1.969203  |
| 30 | 1  | 2.738376  | 1.308543  | 2.125966  |
| 31 | 1  | 1.360402  | 0.647333  | 2.947813  |
| 32 | 7  | 1.730824  | -0.226558 | 1.074953  |
| 33 | 7  | -1.035362 | -1.121235 | 1.331915  |
| 34 | 7  | -0.445286 | 1.717316  | 1.004755  |
| 35 | 8  | 0.012268  | -2.461206 | -0.815602 |
| 36 | 8  | 1.975153  | 1.121446  | -1.297149 |
| 37 | 8  | 4.190962  | 1.174617  | -1.087450 |
| 38 | 8  | -1.023588 | -4.334148 | -0.203941 |
| 39 | 8  | -3.230883 | 2.959810  | -0.837871 |
| 40 | 8  | -2.131874 | 1.034063  | -1.038687 |
| 41 | 35 | -0.228162 | -0.381867 | -3.853486 |

-----  
E(RwB97XD) = -3873.0597367 Hartree

Zero-point correction = 0.322986

Thermal correction to Energy = 0.345592

Thermal correction to Enthalpy = 0.346536

Thermal correction to Gibbs Free Energy = 0.269221

Sum of electronic and zero-point Energies = -3872.736751

Sum of electronic and thermal Energies = -3872.714145

Sum of electronic and thermal Enthalpies = -3872.713201

Sum of electronic and thermal Free Energies = -3872.790515

**Table S8.** Cartesian coordinates obtained from geometry optimizations for the [Bi(NOTA)I]<sup>-</sup> system.

| Center<br>Number | Atomic<br>Number | Coordinates (Angstroms) |           |           |
|------------------|------------------|-------------------------|-----------|-----------|
|                  |                  | X                       | Y         | Z         |
| 1                | 83               | -0.034768               | -0.071167 | -0.774920 |
| 2                | 6                | 3.074903                | 0.762115  | -0.766173 |
| 3                | 6                | 2.981558                | -0.314268 | 0.324368  |
| 4                | 1                | 3.023779                | -1.282277 | -0.180206 |
| 5                | 1                | 3.850084                | -0.245550 | 0.981227  |
| 6                | 6                | -0.840787               | -3.121331 | -0.128816 |

|    |    |           |           |           |
|----|----|-----------|-----------|-----------|
| 7  | 6  | -1.728678 | -2.299145 | 0.815964  |
| 8  | 1  | -2.592898 | -1.970645 | 0.234381  |
| 9  | 1  | -2.095106 | -2.938284 | 1.620846  |
| 10 | 6  | -2.279472 | 2.229240  | -0.587331 |
| 11 | 6  | -1.122225 | 2.775521  | 0.260537  |
| 12 | 1  | -0.408738 | 3.229551  | -0.430813 |
| 13 | 1  | -1.491224 | 3.562447  | 0.920121  |
| 14 | 6  | 1.428190  | -1.473659 | 1.800613  |
| 15 | 1  | 2.112362  | -1.612001 | 2.642962  |
| 16 | 1  | 1.584237  | -2.297798 | 1.109225  |
| 17 | 6  | -0.000691 | -1.501688 | 2.331338  |
| 18 | 1  | -0.202191 | -2.508077 | 2.700058  |
| 19 | 1  | -0.091324 | -0.847759 | 3.194414  |
| 20 | 6  | -1.968383 | -0.113623 | 1.866999  |
| 21 | 1  | -2.425980 | -0.455889 | 2.799803  |
| 22 | 1  | -2.762447 | 0.010350  | 1.135152  |
| 23 | 6  | -1.287320 | 1.225015  | 2.128674  |
| 24 | 1  | -2.063611 | 1.958304  | 2.350290  |
| 25 | 1  | -0.675389 | 1.163986  | 3.024670  |
| 26 | 6  | 0.893352  | 2.130286  | 1.466443  |
| 27 | 1  | 0.822203  | 2.872521  | 2.266886  |
| 28 | 1  | 1.393374  | 2.599975  | 0.623433  |
| 29 | 6  | 1.720219  | 0.954215  | 1.974010  |
| 30 | 1  | 2.741973  | 1.303560  | 2.126919  |
| 31 | 1  | 1.365652  | 0.643943  | 2.953194  |
| 32 | 7  | 1.727634  | -0.228372 | 1.078153  |
| 33 | 7  | -1.034310 | -1.118977 | 1.338483  |
| 34 | 7  | -0.442702 | 1.716697  | 1.012470  |
| 35 | 8  | 0.027539  | -2.457534 | -0.797047 |
| 36 | 8  | 1.961124  | 1.135314  | -1.277763 |
| 37 | 8  | 4.180544  | 1.163869  | -1.101989 |
| 38 | 8  | -1.033574 | -4.326418 | -0.215178 |
| 39 | 8  | -3.230252 | 2.961421  | -0.825548 |
| 40 | 8  | -2.135528 | 1.032199  | -1.020223 |
| 41 | 53 | -0.226056 | -0.397907 | -4.120488 |

-----  
E(RwB97XD) = -1594.6326966 Hartree

Zero-point correction = 0.322699

Thermal correction to Energy = 0.345423

Thermal correction to Enthalpy = 0.346367

Thermal correction to Gibbs Free Energy = 0.267722

Sum of electronic and zero-point Energies = -1594.309997

Sum of electronic and thermal Energies = -1594.287274

Sum of electronic and thermal Enthalpies = -1594.286330

Sum of electronic and thermal Free Energies = -1594.364974

Sample ORCA input file.



```

#
# NEVPT2_BiNOTA2
#
! RIJCOSX tightscf Normalprint dkh2 autoaux moread DKH-def2-
TZVPP
%moinp "NEVPT2_BiNOTA.gbw"
%basis
newgto Bi "SARC-DKH-TZVPP" end
newauxgto Bi "autoaux" end
end
%pal
  nprocs 24
end
% maxcore 55000
* xyz 0 1
Bi      0.00030100    0.00019100   -0.77704500
C      -1.70867900   -2.69600100   -0.61760700
C      -2.39542700   -1.73988100    0.36820100
H      -3.08204100   -1.12121500   -0.21276200
H      -2.98753500   -2.31090300    1.08317900
C      -1.48880700    2.82018200   -0.61948000
C      -0.31299100    2.94306400    0.36056800
H      0.56331600    3.22700900   -0.22552700
H      -0.50876600    3.74452400    1.07268500
C      3.19290500   -0.12774000   -0.61913400
C      2.70678900   -1.20302600    0.36328000
H      2.51259200   -2.10456800   -0.22133500
H      3.49681600   -1.43454400    1.07747500
C      -2.08843300    0.32297600    1.63617100
H      -2.69217300    0.04535400    2.50321000
H      -2.75512400    0.73128100    0.88169000
C      -1.07488700    1.37550100    2.06770200
H      -1.61800200    2.28835000    2.30931000
H      -0.58195800    1.07003300    2.98594000
C      1.32508700    1.65070600    1.62980800
H      1.38793700    2.31511600    2.49446800
H      2.01068500    2.02142900    0.87287200
C      1.72987200    0.24754800    2.06494000
H      2.79177800    0.26189000    2.30750800
H      1.21759400   -0.02311800    2.98351600
C      0.76786700   -1.96993400    1.63113100
H      1.31173600   -2.35747900    2.49549300
H      0.74487700   -2.74916600    0.87422200
C      -0.64877300   -1.61821000    2.06753000
H      -1.16706700   -2.54464700    2.31216300
H      -0.62592400   -1.03860100    2.98554700
N      -1.43501400   -0.86336100    1.05462400
N      -0.03033400    1.67620800    1.05152900
N      1.46828000   -0.81004100    1.05152600
O      -1.67406400    1.65240600   -1.11754600
O      -0.60739600   -2.27344000   -1.12110700
O      -2.25817500   -3.75262700   -0.88715800
O      -2.13259800    3.82159200   -0.88985700
O      4.38340800   -0.07522300   -0.88644800
O      2.27740200    0.61637500   -1.12129700
*

```

```

%cpcm smd true # turn on SMD
SMDsolvent "water" # specify the name of solvent from the list
end
%method
AngularGrid 7
AngularGridX 5
IntAccX 4.5
end
%rel
picturechange true
FiniteNuc true
end
%casscf
nel 2
norb 9
mult 3,1
nroots 6,10
trafostep ri
PTMethod sc_nevpt2
PTSettings
QDType QD_VanVleck
end
rel
DoSOC true
NInitStates 8
end
end

```

**Table S9.** Last orbital frozen during the NEVPT2 step and orbitals included in the active space.

|                                        | Last orbital frozen | Orbitals in the Active Space |
|----------------------------------------|---------------------|------------------------------|
| Bi(III)                                | 33                  | 39-42                        |
| [BiCl <sub>6</sub> ] <sup>3-</sup>     | 63                  | 93-101                       |
| [BiCl <sub>5</sub> ] <sup>2-</sup>     | 58                  | 84-92                        |
| [Bi(DMSO) <sub>8</sub> ] <sup>3+</sup> | 97                  | 207-210                      |
| [Bi(NOTA)]                             | 54                  | 120-128                      |
| [Bi(NOTA)Cl] <sup>-</sup>              | 59                  | 129-137                      |
| [Bi(NOTA)Br] <sup>-</sup>              | 63                  | 138-146                      |
| [Bi(NOTA)I] <sup>-</sup>               | 72                  | 147-155                      |
